# Supplementary material
Source: Elsevier journal article supplement (https://www.sciencedirect.com/science/article/pii/S0300893213002297)
Supplement: mmc1 [file mmc1.pdf]

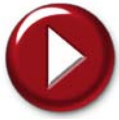

**Material adicional**

---

## **Troponina cardiaca ultrasensible: de la teoría a la práctica clínica**

Allan S. Jaffe<sup>a</sup> y Jordi Ordonez-Llanos<sup>b</sup>

*<sup>a</sup>Cardiovascular Division, Department of Medicine and Department of Laboratory Medicine and Pathology, Mayo Clinic, Rochester, Minnesota, Estados Unidos*

*<sup>b</sup>Servei de Bioquímica Clínica, Hospital de Sant Pau i Institut d'Investigacions Biomèdiques Sant Pau, Department de Bioquímica y Biologia, Universitat Autònoma de Barcelona, Barcelona, España*

---

## REFERENCIAS ADICIONALES

### Introduction

- The Joint European Society of Cardiology/American College of Cardiology Committee. Myocardial infarction redefined — A consensus document of the Joint European Society of Cardiology/American College of Cardiology Committee for the redefinition of myocardial infarction. *Eur Heart J* 2000; 21:1502-13.
- Thygesen K, Alpert JS, White HD, Joint ESC/ACCF/AHA/WHF Task Force for the Redefinition of Myocardial Infarction. Universal definition of myocardial infarction. *Eur Heart J*. 2007;28:2525-38.

### Definition of a High Sensitivity Assays

- Apple FS. New season for cardiac troponin assays: It's time to keep a scorecard. *Clin Chem*. 2009;55:1303-6.

### Who is a Normal Reference Subject?

- Olivieri F, Galeazzi R, Giavarina D, Testa R, Abbatecola AM, Çeka A, et al. Aged-related increase of high sensitive troponin T and its implication in acute myocardial infarction diagnosis of elderly patients. *Mech Ageing Dev*. 133;5:300-5.
- Apple FS, Collinson PO for the IFCC Task Force on Clinical Applications of Cardiac Biomarkers. Analytical characteristics of high-sensitivity cardiac troponin assays. *Clin Chem*. 2012;58:54-61.

### Analytical Issues

- Apple FS, Jaffe A. Clinical implications of a recent adjustment to the high-sensitivity cardiac troponin T assay: User beware. *Clin Chem*. 2012;58:1599-600.
- Hammarsten O, Jacobsson CE, Widegren M, Danylchenko T, Jaffe AS. Long-time quality assessment of the Elecsys troponin T hs assay. *Clin Biochem*. 2013. In press.

### Using hs-cTn to Diagnose Acute Myocardial Infarction

- Harris EK, Yasaka T. On the calculation of a "reference change" for comparing two consecutive measurements. *Clin Chem*. 1983;29:25-30.
- Wu AH, Jaffe AS. The clinical need for high sensitivity cardiac troponin assays for acute coronary syndromes and the role for serial testing. *Am Heart J*. 2008;155:208–14.
- Nordenskjöld AM, Ahlström H, Eggers KM, Fröbert O, Jaffe AS, Venge P, et al. Short- and long-term individual variation in cardiac troponin in patients with stable coronary artery disease. *Clin Chem*. 2013;59:401-9.
- Mueller M, Biener M, Vafaie M, Doerr S, Keller T, Blankenberg S, et al. Absolute and relative kinetic changes of high-sensitivity cardiac troponin T in acute coronary syndrome and in patients with increased troponin in the absence of acute coronary syndrome. *Clin Chem*. 2012;58:209-18.
- Keller T, Zeller T, Ojeda F, Tzikas S, Lillpopp L, Sinning C, et al. Serial changes in highly sensitive troponin I assay and early diagnosis of myocardial infarction. *J Am Med Assoc*. 2011;306:2684-93.
- Apple FS, Smith SW, Pearce LA, Murakami MM. Delta changes for optimizing clinical specificity and 60-day risk of adverse events in patients presenting with symptoms suggestive of acute coronary syndrome utilizing the ADVIA centaur TnI-ultra assay. *Clin Biochem*. 2012;45:711-3.

### **The Timing to Diagnosis of Acute Myocardial Infarction**

- Reichlin T, Schindler C, Drexler B, Twerenbold R, Reiter M, Zellweger C, et al. One-hour rule-out and rule-in of acute myocardial infarction using high-sensitivity cardiac troponin T. *Arch Intern Med*. 2012;172:1211-8.
- Reichlin T, Hochholzer W, Bassetti S, Steuer S, Stelzig C, Hartwiger S, et al. Early diagnosis of myocardial infarction with sensitive cardiac troponin assays. *N Engl J Med*. 2009;361:858-67.
- Body R, Carley S, McDowell G, Jaffe AS, France M, Cruickshank K, et al. Rapid exclusion of acute myocardial infarction in patients with undetectable troponin using a high-sensitivity assay. *J Am Coll Cardiol*. 2011;58:1332-9.
- Landesberg G, Beattie WS, Mosseri M, Jaffe AS, Alpert JS. Perioperative myocardial infarction. *Circulation*. 2009;119:2936-44.

**The Ability of Hs-Ctn Assays to Help With Chronic Cardiovascular Disease**

- de Lemos JA, Drazner MH, Omland T, Ayers CR, Khera A, Rohatgi A, et al. Association of troponin T detected with a highly sensitive assay and cardiac structure and mortality risk in the general population. *J Am Med Assoc.* 2010;304:2503-12.
- Saunders JT, Nambi V, de Lemos JA, Chambless LE, Virani SS, Boerwinkle E, et al. Cardiac troponin T measured by a highly sensitive assay predicts coronary heart disease, heart failure, and mortality in the Atherosclerosis Risk in Communities study. *Circulation.* 2011;123:1367-76.
- Xue Y, Clopton P, Peacock WF, Maisel AS. Serial changes in high-sensitive troponin I predict outcome in patients with decompensated heart failure. *Eur J Heart Fail.* 2011;13:37-42.
- Latini R, Masson S, Anand IS, Missov E, Carlson M, Vago T, Val-HeFT Investigators. Prognostic value of very low plasma concentrations of troponin T in patients with stable chronic heart failure. *Circulation.* 2007;116:1242-9.
- Masson S, Anand I, Favero C, Barlera S, Vago T, Bertocchi F, Valsartan Heart Failure Trial (Val-HeFT) and Gruppo Italiano per lo Studio della Sopravvivenza nell'Insufficienza Cardiaca-Heart Failure (GISSI-HF) Investigators. Serial measurement of cardiac troponin T using a highly sensitive assay in patients with chronic heart failure: data from 2 large randomized clinical trials. *Circulation.* 2012;125:280-8.
- Moreno V, Hernandez-Romero D, Vilchez JA, Garcia-Honrubia A, Cambronero F, Casas T, et al. Serum levels of high-sensitivity troponin T: a novel marker for cardiac remodeling in hypertrophic cardiomyopathy. *J Cardiac Fail.* 2010;16:950-6.
- Weber M, Luchner A, Seeberger M, Mueller C, Liebetrau C, Schlitt A, et al. Incremental value of high-sensitive troponin T in addition to the revised cardiac index for perioperative risk stratification in non-cardiac surgery. *Eur Heart J.* 2013;34:853-62.
- Nagele P, Brown F, Gage BF, Gibson DW, Miller JP, Jaffe AS, et al. High-sensitivity cardiac troponin T in prediction and diagnosis of myocardial infarction and long-term mortality after non-cardiac surgery. *Am Heart J.* 2013. In press.
